# Supplementary material for: A New Alien Invasive Longhorn Beetle, Xylotrechus chinensis (Cerambycidae), Is Infesting Mulberries in Catalonia (Spain)
Source: Insects. 2018 May 9;9(2):52. doi: 10.3390/insects9020052 (PMC6023466; doi:10.3390/insects9020052)
Supplement: Supplementary file 1 [file insects-09-00052-s001.xlsx]

## Sheet: Dades estacio Vilanova del Vall
	Automatic Weather Station of Vilanova del Vallès				UTM X, UTM Y	441627.00, 4599430.00	Altitud 126 m
Date	Average daily relative humidity (%)	Average daily temperature (ºC)	Cumulative daily precipitation (in mm)		Date	Average daily relative humidity (%)	Average daily temperature (ºC)	Cumulative daily precipitation (in mm)
01/05/2016	59	11.1	0		01/05/2017	73	11.3	0
02/05/2016	59	13.6	0		02/05/2017	72	12.9	0.2
03/05/2016	73	13.3	0		03/05/2017	86	11.7	2.1
04/05/2016	72	13.9	0		04/05/2017	81	13.5	0.1
05/05/2016	71	13.7	0.1		05/05/2017	70	15	0
06/05/2016	76	14.3	0.4		06/05/2017	62	16.9	0
07/05/2016	81	13.5	2.5		07/05/2017	73	14.5	0
08/05/2016	88	13.6	1.6		08/05/2017	74	14.5	0
09/05/2016	89	15.2	5.2		09/05/2017	74	15	0
10/05/2016	82	13.5	10.1		10/05/2017	76	16.3	0
11/05/2016	77	14	0.1		11/05/2017	81	15.7	11.7
12/05/2016	76	13.9	2		12/05/2017	62	17.7	0.1
13/05/2016	81	13.4	1.2		13/05/2017	59	18.4	0
14/05/2016	76	14.8	2.5		14/05/2017	65	18.2	0
15/05/2016	77	15.9	0.2		15/05/2017	63	18.2	0
16/05/2016	76	15.9	0		16/05/2017	59	19.3	0
17/05/2016	75	14.6	0		17/05/2017	57	18.6	0
18/05/2016	78	15.6	0		18/05/2017	71	16.9	0.3
19/05/2016	76	15.5	0		19/05/2017	63	15.6	0
20/05/2016	73	16.2	0		20/05/2017	67	15.6	0
21/05/2016	71	16.8	0		21/05/2017	69	16.7	0
22/05/2016	82	15.1	3.7		22/05/2017	67	18	0
23/05/2016	66	13.8	0.1		23/05/2017	66	19.4	0
24/05/2016	74	14.5	0		24/05/2017	58	21.1	0
25/05/2016	71	17	0		25/05/2017	53	21.6	0
26/05/2016	69	17.5	0		26/05/2017	68	19.7	0
27/05/2016	68	17.7	0		27/05/2017	65	20.5	0
28/05/2016	80	17	1.5		28/05/2017	55	19.9	0
29/05/2016	61	18.5	0.2		29/05/2017	50	19.7	0
30/05/2016	72	16	0		30/05/2017	68	17.3	3.7
31/05/2016	71	16.1	1.2		31/05/2017	64	18.9	0
01/06/2016	70	16.8	0		01/06/2017	63	19.9	0
02/06/2016	68	17	0		02/06/2017	68	20.8	0
03/06/2016	70	17.4	0		03/06/2017	62	22.5	0
04/06/2016	65	17.8	0		04/06/2017	78	18.8	9
05/06/2016	67	19	0		05/06/2017	79	17.5	0.4
06/06/2016	68	19.6	0		06/06/2017	68	19.2	0
07/06/2016	59	20.8	0		07/06/2017	74	17.9	0
08/06/2016	65	20.9	0		08/06/2017	73	20.4	0
09/06/2016	57	21.9	0		09/06/2017	72	20.6	0.3
10/06/2016	55	20.7	0		10/06/2017	58	22.3	0
11/06/2016	71	19.3	0.6		11/06/2017	43	23.4	0
12/06/2016	67	19.8	0		12/06/2017	45	23.7	0
13/06/2016	74	20.2	0		13/06/2017	50	24.4	0
14/06/2016	66	20.4	0		14/06/2017	46	25	0
15/06/2016	71	19.9	0		15/06/2017	39	25.7	0
16/06/2016	52	19.5	0		16/06/2017	50	26.3	0
17/06/2016	67	17.4	0.4		17/06/2017	60	25.3	0
18/06/2016	80	14.9	14.2		18/06/2017	60	24.3	0
19/06/2016	64	17	0.1		19/06/2017	68	23.7	0
20/06/2016	66	18.2	0		20/06/2017	64	24.6	0
21/06/2016	61	21	0		21/06/2017	63	24.3	0
22/06/2016	53	21.7	0		22/06/2017	61	25.2	0
23/06/2016	49	22.1	0		23/06/2017	57	25.2	0
24/06/2016	56	21.4	0		24/06/2017	63	24.4	0
25/06/2016	58	22.9	0		25/06/2017	74	23.6	0.2
26/06/2016	68	21	0		26/06/2017	58	25.4	0.1
27/06/2016	69	21.4	0		27/06/2017	70	23.7	0
28/06/2016	71	21.5	0		28/06/2017	59	23.2	5.6
29/06/2016	63	22.6	0		29/06/2017	53	20.3	0.1
30/06/2016	65	22.8	0		30/06/2017	53	19.9	0.5
01/07/2016	64	23.1	0		01/07/2017	54	18.7	0
02/07/2016	68	22	0		02/07/2017	55	20.1	0
03/07/2016	72	21.8	0		03/07/2017	57	21.4	0
04/07/2016	67	22.7	0		04/07/2017	53	22.4	0
05/07/2016	60	24.4	0		05/07/2017	64	21.8	0
06/07/2016	62	23.9	0		06/07/2017	58	23.7	0
07/07/2016	67	24	0		07/07/2017	45	25.3	0
08/07/2016	58	25.4	0.1		08/07/2017	46	24.7	0.1
09/07/2016	58	25.1	0		09/07/2017	67	23.6	0
10/07/2016	57	25.4	0		10/07/2017	68	23.7	0
11/07/2016	61	24.5	0.1		11/07/2017	70	23.8	0
12/07/2016	64	23.7	0		12/07/2017	68	25.1	0
13/07/2016	54	21.8	0		13/07/2017	72	24.9	0
14/07/2016	54	20.5	0		14/07/2017	73	23.5	0.1
15/07/2016	63	19.9	0		15/07/2017	69	24.5	0
16/07/2016	67	20.4	0		16/07/2017	62	24.5	0
17/07/2016	57	22.2	0		17/07/2017	57	24.3	0
18/07/2016	65	21.3	0		18/07/2017	65	24.4	0
19/07/2016	65	21.9	0		19/07/2017	67	24.9	0
20/07/2016	60	24.6	0		20/07/2017	61	24.4	0.1
21/07/2016	64	24.9	0		21/07/2017	68	23	1.7
22/07/2016	71	22.1	16.1		22/07/2017	70	24	0
23/07/2016	69	21.2	0.1		23/07/2017	72	23.1	4.7
24/07/2016	64	22.8	0		24/07/2017	70	22.8	0.1
25/07/2016	62	24.4	0		25/07/2017	69	21.9	1.2
26/07/2016	66	24.6	0		26/07/2017	71	21.5	0
27/07/2016	73	23.5	0		27/07/2017	71	23.4	0
28/07/2016	71	23.7	0		28/07/2017	69	24.3	0
29/07/2016	72	23.9	0		29/07/2017	65	24.6	0
30/07/2016	69	24.4	0		30/07/2017	60	24.8	0
31/07/2016	69	24.5	0		31/07/2017	64	24.8	0
01/08/2016	65	23.6	0		01/08/2017	77	24.2	0.2
02/08/2016	72	24	0		02/08/2017	60	26.7	0
03/08/2016	70	24.5	0		03/08/2017	51	27.3	0
04/08/2016	55	25.7	0		04/08/2017	56	27.3	0
05/08/2016	66	23.4	0.3		05/08/2017	58	27.7	0
06/08/2016	63	23.2	0.1		06/08/2017	66	25.4	0
07/08/2016	55	22.5	0		07/08/2017	67	25.4	0
08/08/2016	56	23.6	0		08/08/2017	73	23	3.9
09/08/2016	63	22.9	15.5		09/08/2017	66	19.8	2.2
10/08/2016	77	20.5	2.8		10/08/2017	66	19.9	0.2
11/08/2016	69	20.3	0		11/08/2017	63	19.8	0
12/08/2016	69	21.3	0		12/08/2017	70	20.6	0.3
13/08/2016	63	21.4	0		13/08/2017	67	21.6	0
14/08/2016	71	21.4	0		14/08/2017	67	22.4	0
15/08/2016	70	22.2	0		15/08/2017	71	22.5	0
16/08/2016	68	23.7	0		16/08/2017	65	23.3	0
17/08/2016	70	23.2	0		17/08/2017	63	24.1	0
18/08/2016	71	23.1	0		18/08/2017	64	25.3	0
19/08/2016	73	23.9	0		19/08/2017	73	23.4	0
20/08/2016	66	23.6	0		20/08/2017	70	23.3	0
21/08/2016	62	22.5	0		21/08/2017	70	22.8	0
22/08/2016	66	22.7	0		22/08/2017	70	23.3	0
23/08/2016	58	22.2	0		23/08/2017	67	23.4	0.1
24/08/2016	51	22.8	0		24/08/2017	68	23.3	0
25/08/2016	51	22.2	0		25/08/2017	68	23.6	0
26/08/2016	63	21.9	0		26/08/2017	73	24.2	0
27/08/2016	71	22.1	0		27/08/2017	73	24.7	0
28/08/2016	74	23.5	0		28/08/2017	70	24.9	0
29/08/2016	74	23.6	0		29/08/2017	60	25.2	0
30/08/2016	69	22.3	0		30/08/2017	61	23.5	0.6
31/08/2016	67	22.4	0		31/08/2017	82	19.4	18.2
01/09/2016	58	24	0		01/09/2017	71	19.9	0
02/09/2016	65	23.5	0		02/09/2017	68	19.1	1.8
03/09/2016	70	24.4	0		03/09/2017	72	19.5	0
04/09/2016	63	25	0		04/09/2017	75	20.9	1
05/09/2016	58	25.2	0		05/09/2017	73	22	0
06/09/2016	63	24	0		06/09/2017	80	22	0.5
07/09/2016	67	22.4	0		07/09/2017	73	20.7	0.4
08/09/2016	68	22.1	0		08/09/2017	77	19.2	0.2
09/09/2016	70	24	0		09/09/2017	84	17.4	8.6
10/09/2016	76	21.8	5.7		10/09/2017	71	16.4	0.1
11/09/2016	67	22.7	0.1		11/09/2017	68	18.9	0
12/09/2016	75	22.5	0		12/09/2017	75	19.6	1.9
13/09/2016	71	22.9	12.3		13/09/2017	71	20.3	0
14/09/2016	73	19.3	4.3		14/09/2017	81	19.5	16.3
15/09/2016	64	16.6	0.1		15/09/2017	91	12.9	7
16/09/2016	61	17.6	0		16/09/2017	77	13.3	0.2
17/09/2016	72	16.8	0.5		17/09/2017	69	15.3	0
18/09/2016	73	16.8	0.1		18/09/2017	74	16.4	1.5
19/09/2016	62	19	0		19/09/2017	75	16.7	0
20/09/2016	71	19	0		20/09/2017	72	15.3	0
21/09/2016	72	19.1	0		21/09/2017	77	17.7	0
22/09/2016	75	19.2	0		22/09/2017	83	17.3	0.3
23/09/2016	79	19.1	5.9		23/09/2017	78	18.3	0
24/09/2016	80	17.8	0.1		24/09/2017	80	19.4	0
25/09/2016	79	18	12.7		25/09/2017	76	18.4	0.1
26/09/2016	82	17.8	0.1		26/09/2017	75	17.4	0
27/09/2016	73	19	2.4		27/09/2017	75	17.7	0
28/09/2016	74	18	0.2		28/09/2017	78	17.6	0
29/09/2016	79	17.2	0.1		29/09/2017	78	18.2	0
30/09/2016	79	17.8	0.1		30/09/2017	84	17.5	1.1
